# Supplementary material for: Toxic effects and bioaccumulation of pinacolyl methylphosphonate acid in zebrafish following soman exposure to a water environment
Source: Royal Society of Chemistry journal article supplement (doi:10.1039/d3ra00856h), 2023-01-01
Supplement: d3ra00856h1.pdf [file d3ra00856h1.pdf]

## **Supplementary information**

**Pinacolyl methylphosphonate acid toxic effects and  
bioaccumulation obviously in zebrafish following soman  
exposure to water environment**

Xing-Xing Zong, Niannian Cao, Qian Jing, Xuejun Chen, Tong Shi, Ruihua Zhang,  
Jingjing Shi, Chen Wang\*, Liqin Li\*

State Key Laboratory of NBC Protection for Civilian, Beijing, 102205, PR China

## **Figure legends:**

**Figure S1.** The structures of soman, PMPA, IMPA.

**Figure S2.** The TIC of QCs sample at three different levels.

**Figure S3.** Mass chromatogram from the MRM transition for the blank matrix of whole zebrafish.

**Figure S4.** Mass chromatogram from the MRM transition for test sample of whole zebrafish.

**Figure S5.** Calibration curve for test sample of whole zebrafish.

**Figure S6.** Mass chromatogram from the MRM transition for whole zebrafish sample at 0.1, 0.25, 0.5, 1.0 ng/mL.

**Figure S7.** Mass chromatogram from the MRM transition for test sample of whole zebrafish and tissue.

**Table S1.** The parameters of characteristic transitions, fragmentor voltages, and collision energy for PMPA and IMPA.

**Table S2.** Intra-and inter-day precisions and accuracies of PMPA in whole zebrafish and tissue.

**Table S3.** Extraction recoveries and matrix effects of PMPA in whole zebrafish and tissue.

**Table S4.** Stabilities of PMPA at three freeze-thaw cycles; long-term storage; and short-term storage in whole zebrafish and tissue.

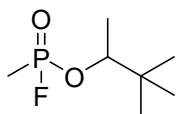

Soman, Pinacolyl  
methylphosphonofluoridate

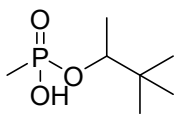

PMPA, Pinacolyl  
methylphosphonate

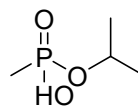

IMPA, Isopropyl  
methylphosphonate

**Figure S1.** The structures of soman, PMPA, IMPA.

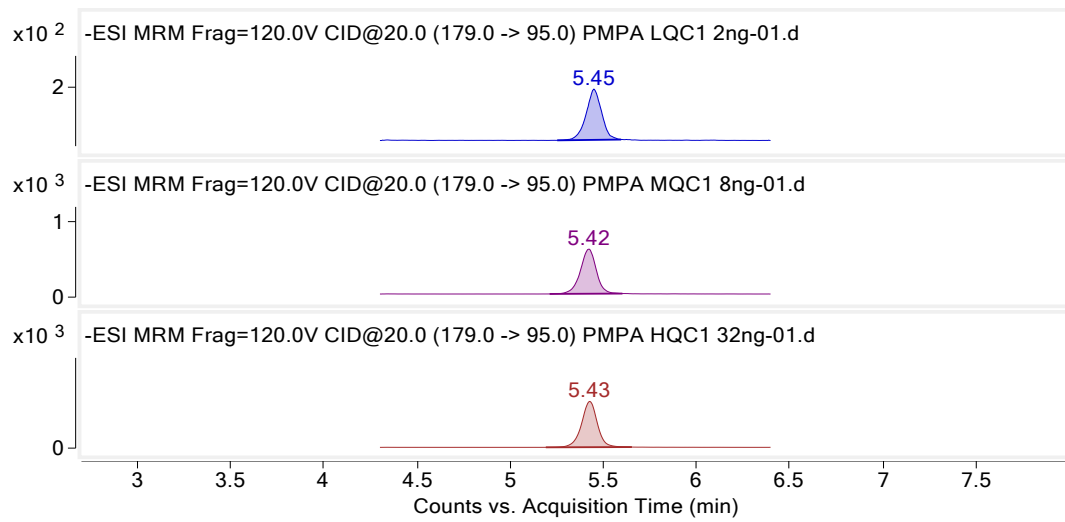

**Figure S2.** The TIC of QCs sample at three different levels.

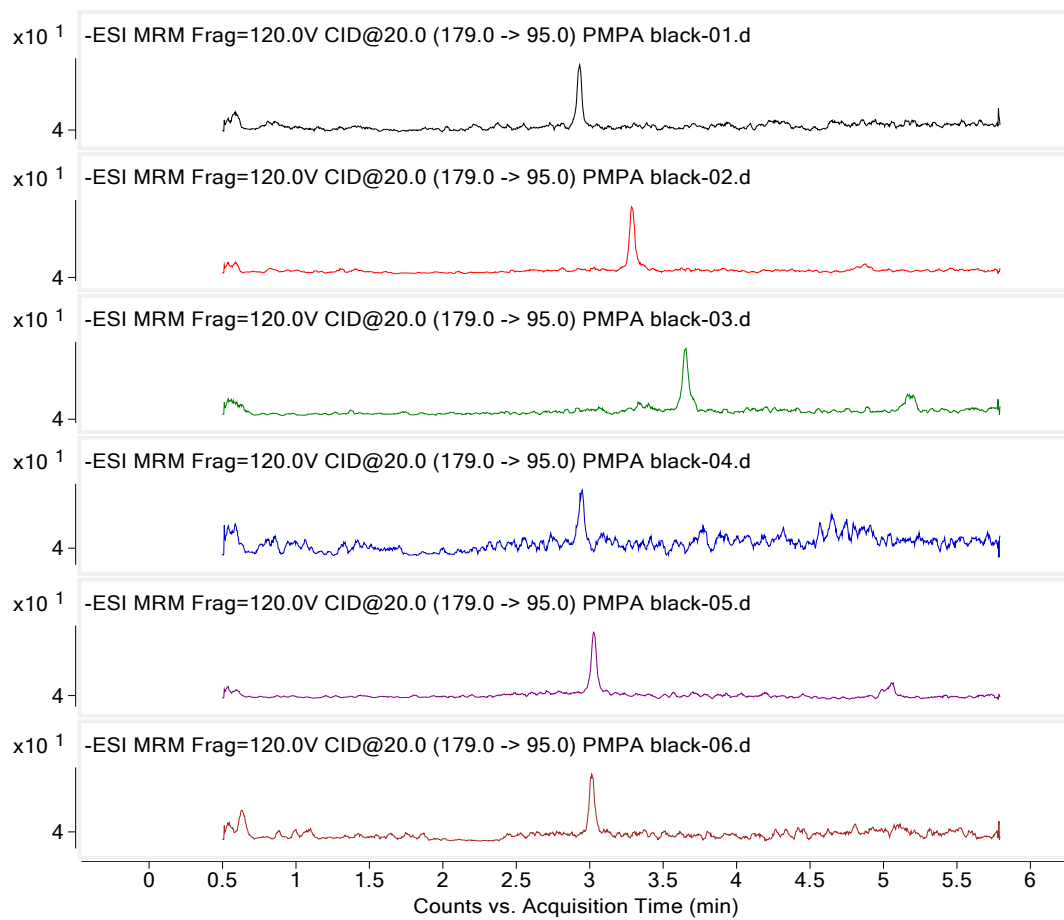

**Figure S3.** Mass chromatogram from the MRM transition for the blank matrix of whole zebrafish.

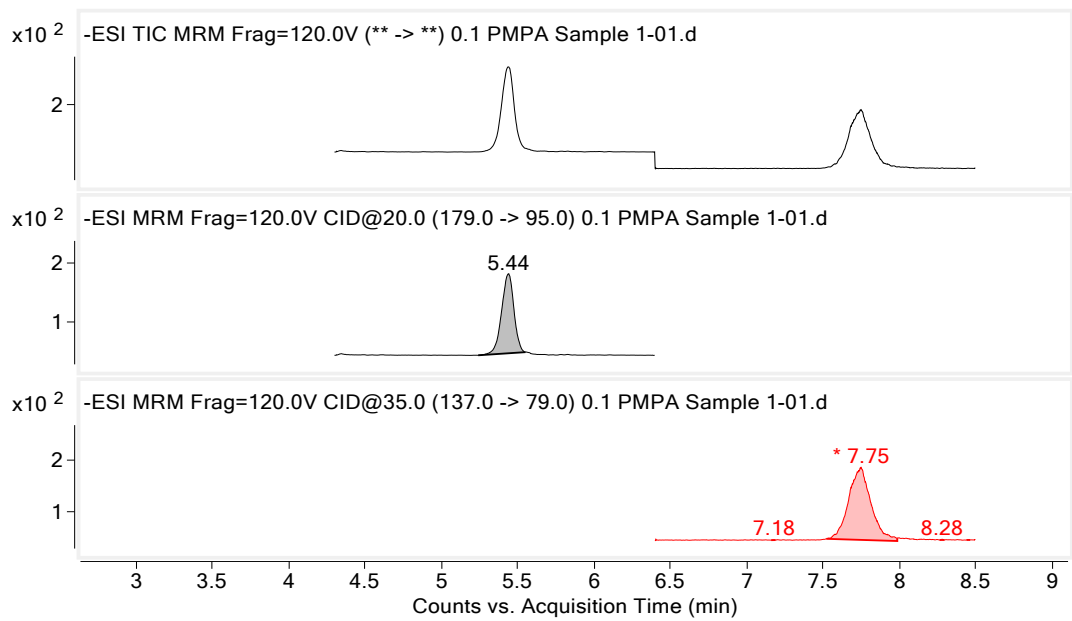

**Figure S4.** Mass chromatogram from the MRM transition for test sample of whole zebrafish.

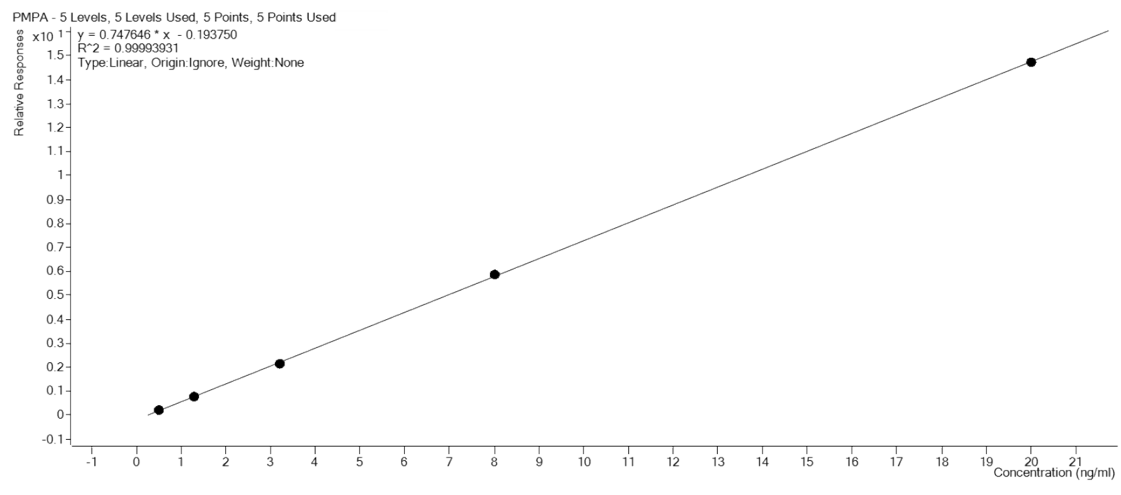

**Figure S5.** Calibration curve for test sample of whole zebrafish.

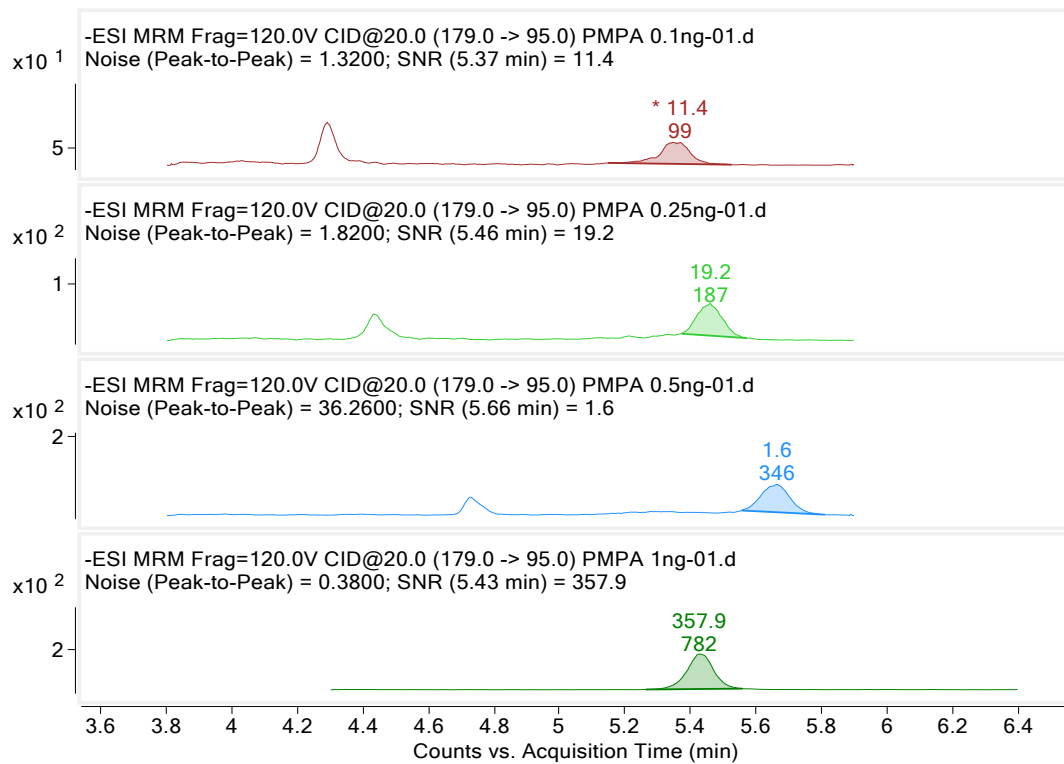

**Figure S6.** Mass chromatogram from the MRM transition for whole zebrafish sample at 0.1, 0.25, 0.5, 1.0 ng/mL.



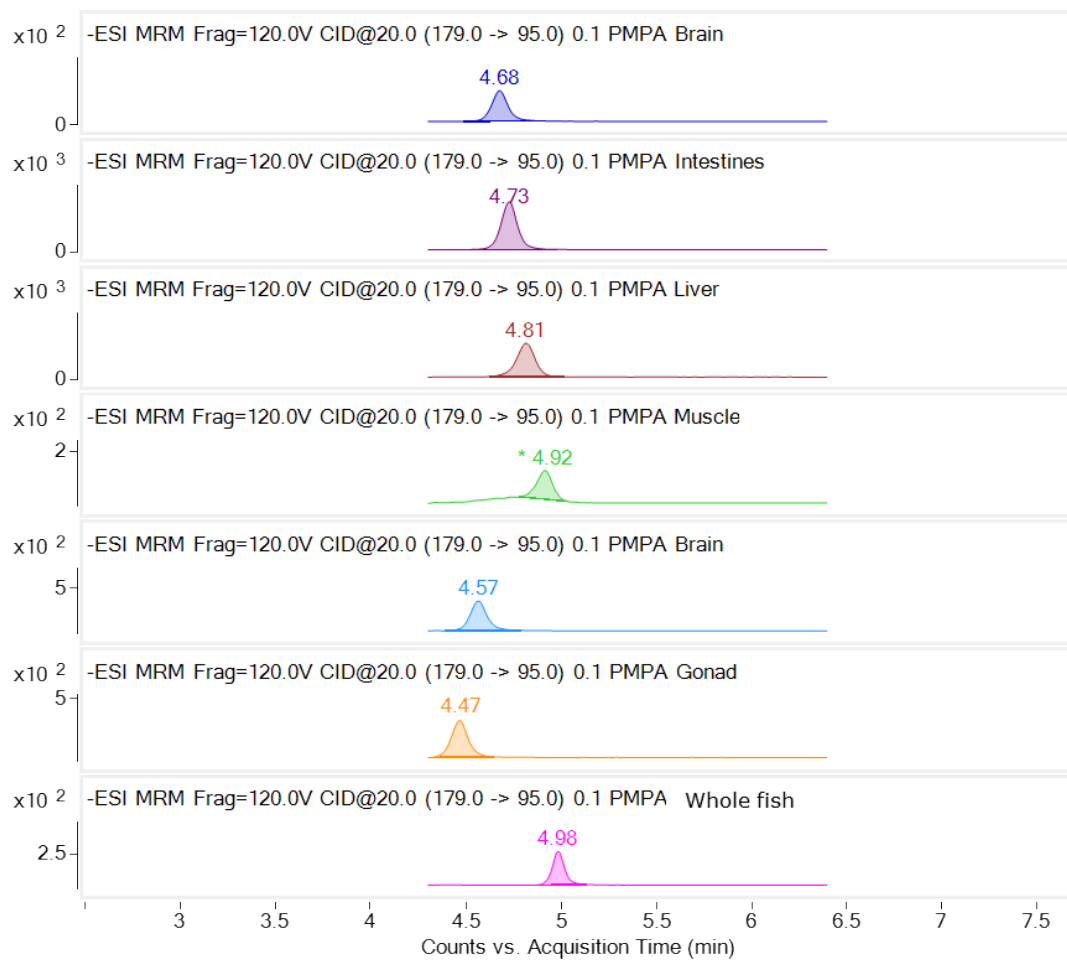

**Figure S7.** Mass chromatogram from the MRM transition for test sample of whole zebrafish and tissue.

**Table S1.** The parameters of characteristic transitions, fragmentor voltages, and collision energy for PMPA and IMPA.

| Analytes | Transitions | Precursor ion (m/z) | Product ion (m/z) | Fragmentor (V) | Collision Energy (V) | Retention time (min) |
|----------|-------------|---------------------|-------------------|----------------|----------------------|----------------------|
| PMPA     | Target      | 179.0               | 95.0              | 120            | 20                   | 5.2                  |
|          | Qualifier   | 179.0               | 79.0              | 120            | 45                   |                      |
| IMPA     | Target      | 137.0               | 95.0              | 120            | 20                   | 7.5                  |
|          | Qualifier   | 137.0               | 79.0              | 120            | 45                   |                      |

**Table S2.** Intra-and inter-day precisions and accuracies of PMPA in whole zebrafish and tissue.

| Sample     | Precision         |        |      |                   |        |      | Accuracy         |        |      |                  |        |      |
|------------|-------------------|--------|------|-------------------|--------|------|------------------|--------|------|------------------|--------|------|
|            | Intra-day (RSD %) |        |      | Inter-day (RSD %) |        |      | Intra-day (RE %) |        |      | Inter-day (RE %) |        |      |
|            | Low               | Medium | High | Low               | Medium | High | Low              | Medium | High | Low              | Medium | High |
| Whole fish | 6.2               | 5.5    | 4.7  | 7.6               | 4.4    | 2.8  | -2.4             | 1.7    | -2.8 | -2.9             | -3.7   | 3.0  |
| Muscle     | 7.8               | 8.4    | 5.8  | 7.1               | 6.8    | 4.3  | 6.2              | 5.5    | 5.9  | -4.2             | 6.1    | 2.8  |
| Liver      | 8.5               | 7.2    | 6.9  | 10.6              | 5.1    | 5.5  | 11.2             | 5.7    | 8.5  | 12.9             | 10.7   | -6.2 |
| Gonad      | 10.3              | 8.7    | 7.7  | 7.9               | 8.3    | 5.9  | 7.6              | -8.1   | 8.7  | -6.7             | 7.9    | -7.5 |
| Intestine  | 11.5              | 10.6   | 9.3  | 7.7               | 8.8    | 5.3  | -12.6            | 10.5   | 6.1  | 8.4              | -9.1   | 7.7  |
| Brain      | 8.1               | 7.4    | 6.6  | 9.9               | 8.0    | 4.6  | -3.3             | 4.4    | 2.2  | 5.5              | -6.3   | 3.8  |

**Table S3.** Extraction recoveries and matrix effects of PMPA in whole zebrafish and tissue.

| Sample     | Extraction recovery (%) |        |       | Matrix effect (%) |        |      |
|------------|-------------------------|--------|-------|-------------------|--------|------|
|            | Low                     | Medium | High  | Low               | Medium | High |
| Whole fish | 112.2                   | 107.2  | 106.1 | 88.5              | 77.3   | 89.2 |
| Muscle     | 87.3                    | 115.5  | 98.26 | 79.1              | 83.9   | 82.6 |
| Liver      | 96.2                    | 93.1   | 101.0 | 85.1              | 87.9   | 82.2 |
| Gonad      | 92.4                    | 95.7   | 108.3 | 86.6              | 79.5   | 82.4 |
| Intestine  | 96.7                    | 98.0   | 105.9 | 82.6              | 81.5   | 79.3 |
| Brain      | 113.1                   | 109.1  | 97.8  | 77.8              | 86.6   | 86.8 |

**Table S4.** Stabilities of PMPA at three freeze-thaw cycles; long-term storage; and short-term storage in whole zebrafish and tissue.

| Sample     | Freeze-thaw cycle stability (RE%) |        |       | Long-term stability (RE%) |        |       | Short-term stability (RE%) |        |       |
|------------|-----------------------------------|--------|-------|---------------------------|--------|-------|----------------------------|--------|-------|
|            | Low                               | Medium | High  | Low                       | Medium | High  | Low                        | Medium | High  |
| Whole fish | -7.64                             | -2.45  | 1.88  | -3.92                     | 1.38   | 4.30  | -5.35                      | 1.12   | -5.21 |
| Muscle     | -7.23                             | 2.24   | 3.24  | -2.98                     | -4.99  | -3.48 | -2.60                      | -4.55  | -6.99 |
| Liver      | -2.52                             | -6.61  | -6.53 | 2.16                      | 1.83   | 1.73  | 3.84                       | -5.75  | 1.95  |
| Gonad      | 1.69                              | -5.64  | -5.43 | -4.77                     | -2.69  | -6.85 | -7.16                      | -3.87  | 1.50  |
| Intestine  | -12.68                            | -8.04  | -9.25 | -10.85                    | -8.86  | -7.27 | -14.41                     | -4.62  | -7.57 |
| Brain      | -2.57                             | 2.90   | -2.87 | 2.72                      | -5.73  | -7.82 | -4.48                      | -2.44  | 1.45  |
